# Supplementary material for: Endothelial pyruvate kinase M2 maintains vascular integrity
Source: JCI journal article supplement (doi:10.1172/jci120912), 2018-09-16
Supplement: sd1 [file 1]

1 **Supplementary Figures**

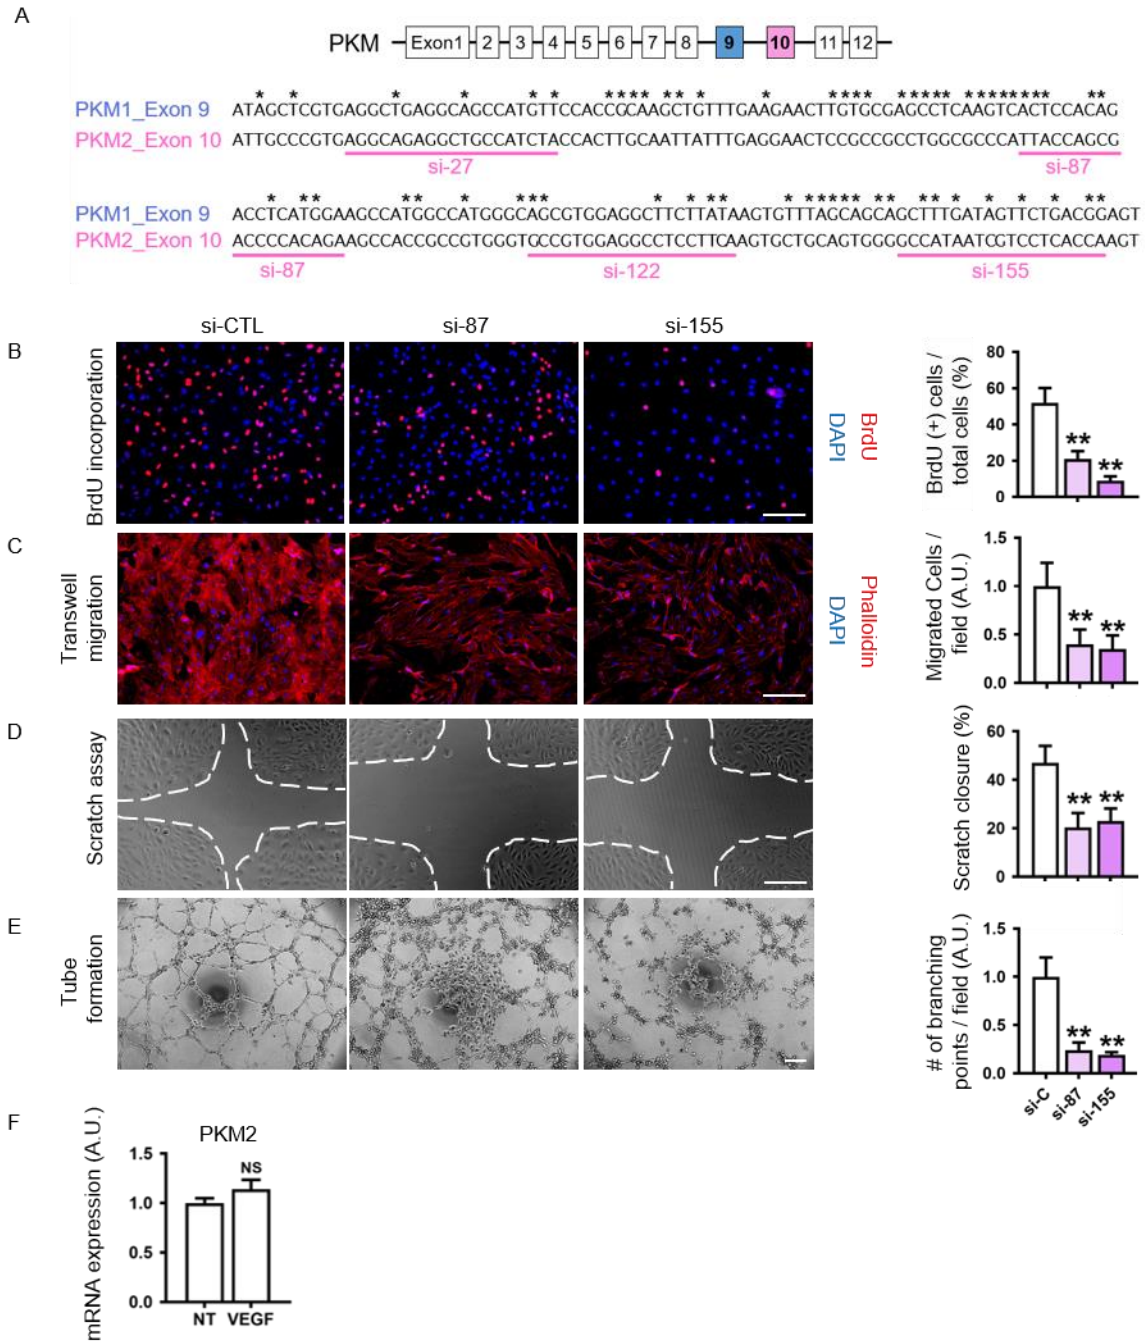

2

3 **Supplementary Figure 1. Schematic of PKM2-specific siRNAs and their effect on**  
 4 **proliferation and migration.**

5 (A) The sequences of Exon 9 and 10 that encodes PKM1 and PKM2, respectively, are shown  
 6 with asterisks above mismatches. The target sequences of the four different si-RNAs are  
 7 underlined in pink. (B) Percentage of BrdU-positive cells are reduced by si-87 and si-155. This

8 experiment was done at the same time as shown in Figure 1D, and therefore the si-CTL data are  
9 the same. For si-CTL, the same data set shown in Figure 1D was re-presented.  $n = 3$ . (C)  
10 Reduction in transwell migration of ECs by si-87 and si-155. Cells that migrated across the  
11 transwell membrane were visualized by staining with phalloidin (red) and DAPI (blue). This  
12 experiment was done at the same time as shown in Figure 1F, and therefore the si-CTL data are  
13 the same.  $n = 3$ . (D) Scratch closure was retarded in ECs with si-87 and si-155.  $n = 3$ . This  
14 experiment was done at the same time as shown in Figure 1G, and therefore the si-CTL data are  
15 the same.  $n = 3$ . (E) Tube formation on matrigel was impaired in ECs with si-87 and si-155.  $n =$   
16 3. (F) VEGF (10ng/ml for 12 hour) treatment does not affect PKM2 expression. Scale bar = 100  
17  $\mu\text{m}$ . All data are represented as mean  $\pm$  STDEV.  $**P < 0.01$ , by two-tailed Student's  $t$ -test.

18

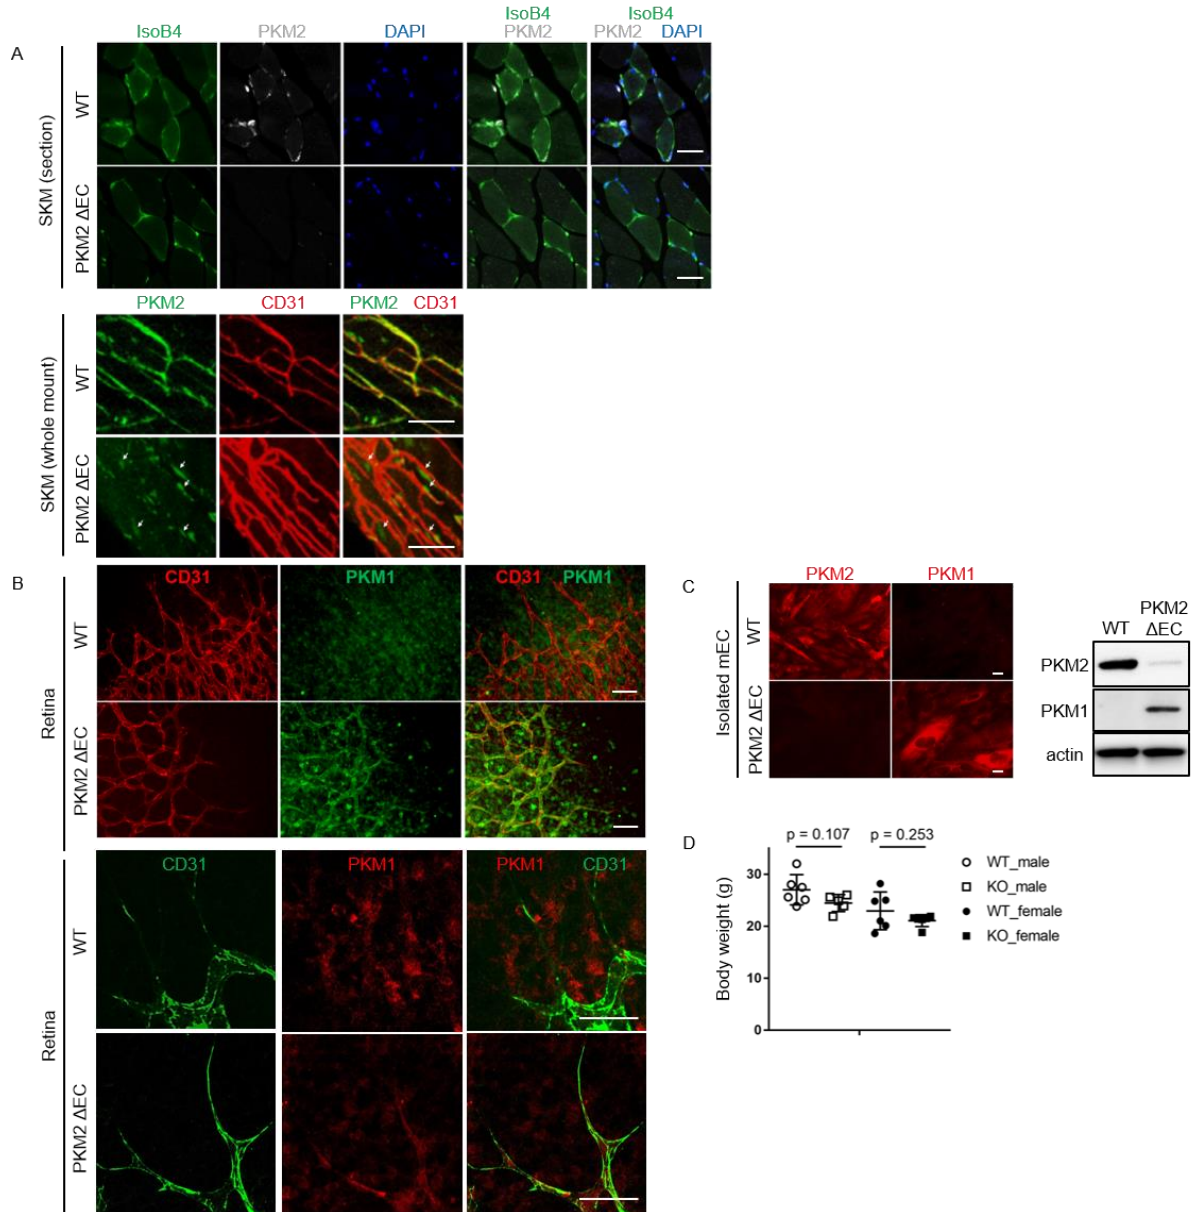

19

20 **Supplementary Figure2. Validation of EC-specific PKM2 knockout mice.**

21 (A) Cross sectional staining of skeletal muscle (SKM, soleus) with IsoB4 (green), PKM2 (white),  
 22 and DAPI (blue) in WT vs PKM2 $\Delta$ EC mice (upper panel). Whole-mount staining of SKM with  
 23 PKM2 (green) and CD31 (red) (lower panel). White arrows indicate non-EC cells expressing  
 24 PKM2 in PKM2 $\Delta$ EC mice. Scale bar = 50  $\mu$ m. (B) Retinal staining (upper panel: 20x and lower  
 25 panel: 40x) of P7 WT vs PKM2 PKM2 $\Delta$ EC mouse with CD31 (red) and PKM1 (green)  
 26 demonstrating induction of PKM1 expression in ECs of PKM2 $\Delta$ EC mice. Scale bar = 50  $\mu$ m. (C)  
 27 Immunocytochemistry (left panel) and Western blot analysis (right panel) of isolated ECs from  
 28 WT vs PKM2 $\Delta$ EC mouse with PKM2 or PKM1 antibody confirms nearly complete knock out of  
 29 PKM2 protein and induction of PKM1 protein in the PKM2 $\Delta$ EC mice. Scale bar = 10  $\mu$ m. (D) Body

30 weight of 15 week old PKM2<sup>ΔEC</sup> mouse as compared to WT littermate controls. Data are presented  
31 as mean ± STDEV, n = 6.

32

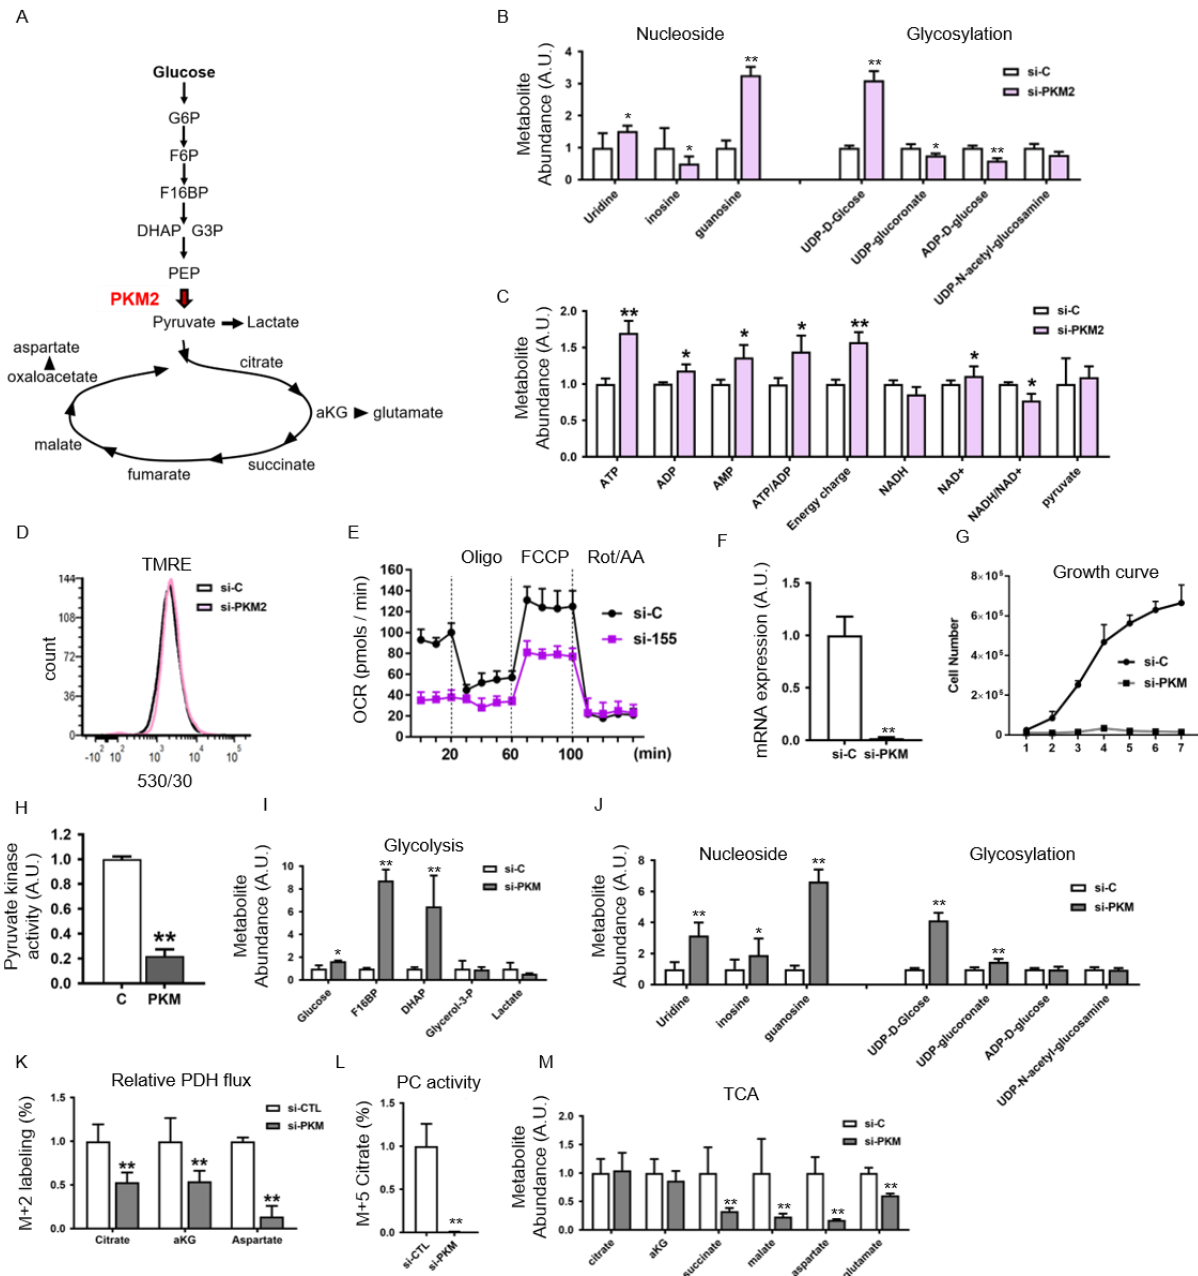

33

34 **Supplementary Figure 3. Knockdown of PKM phenocopies PKM2 knockdown.**

35 (A) Schematic illustration demonstrating upstream and downstream metabolic pathways of  
 36 pyruvate kinase. (B) Relative abundance of metabolites that are upstream of PKM in glycolysis  
 37 in HUVECs with si-C vs si-PKM2 were quantified by mass spectrometry after 24 hrs of  
 38 incubation. *n* = 3. (C) Relative abundance of ATP, ADP, AMP, ATP/ADP ratio, energy charge  
 39 (ATP+1/2ADP / ATP+ADP+AMP), NADH, NAD<sup>+</sup>, NADH/NAD<sup>+</sup>, and pyruvate was  
 40 quantified by mass spectrometry. *n* = 3. (D) Mitochondrial membrane potential of HUVECs with  
 41 si-C vs si-PKM2 was measured by flow cytometry after TMRE staining. The data represents 3  
 42 independent experiments. (E) Oxygen consumption rate (OCR) of HUVECs with si-C vs si-155

43 was measured by Seahorse.  $n = 8$ . (F) qPCR analysis of PKM mRNA level in HUVECS with si-  
44 C vs si-PKM.  $n = 3$ . (G) Growth curve demonstrating complete inhibition of proliferation in si-  
45 PKM HUVECS.  $n = 4$ . (H) Pyruvate kinase activity assay in HUVECS with si-C vs si-PKM.  $n =$   
46 3. (I) Relative abundance of glycolysis intermediates in HUVECS with si-C vs si-PKM were  
47 quantified by mass spectrometry after 24 hrs of incubation.  $n = 3$ . (J) Relative abundance of  
48 metabolites that are upstream of PKM in glycolysis in HUVECS with si-C vs si-PKM were  
49 quantified by mass spectrometry after 24 hrs of incubation.  $n = 3$ . (K) Relative PDH activity  
50 estimated by incorporation of [U- $^{13}\text{C}$ ] glucose into M+2 citrate,  $\alpha\text{KG}$ , and aspartate in HUVECS  
51 with si-C vs si-PKM.  $n = 3$ . (L) Pyruvate carboxylase (PC) activity estimated by incorporation of  
52 [U- $^{13}\text{C}$ ] glucose into M+5 citrate.  $n = 3$ . (M) Relative abundance of TCA cycle intermediates in  
53 HUVECS with si-C vs si-PKM were quantified by mass spectrometry after 24 hrs of incubation.  
54  $n = 3$ . All data are represented as mean  $\pm$  STDEV.  $*P < 0.05$ .  $**P < 0.01$ , by two-tailed  
55 Student's  $t$ -test.  
56

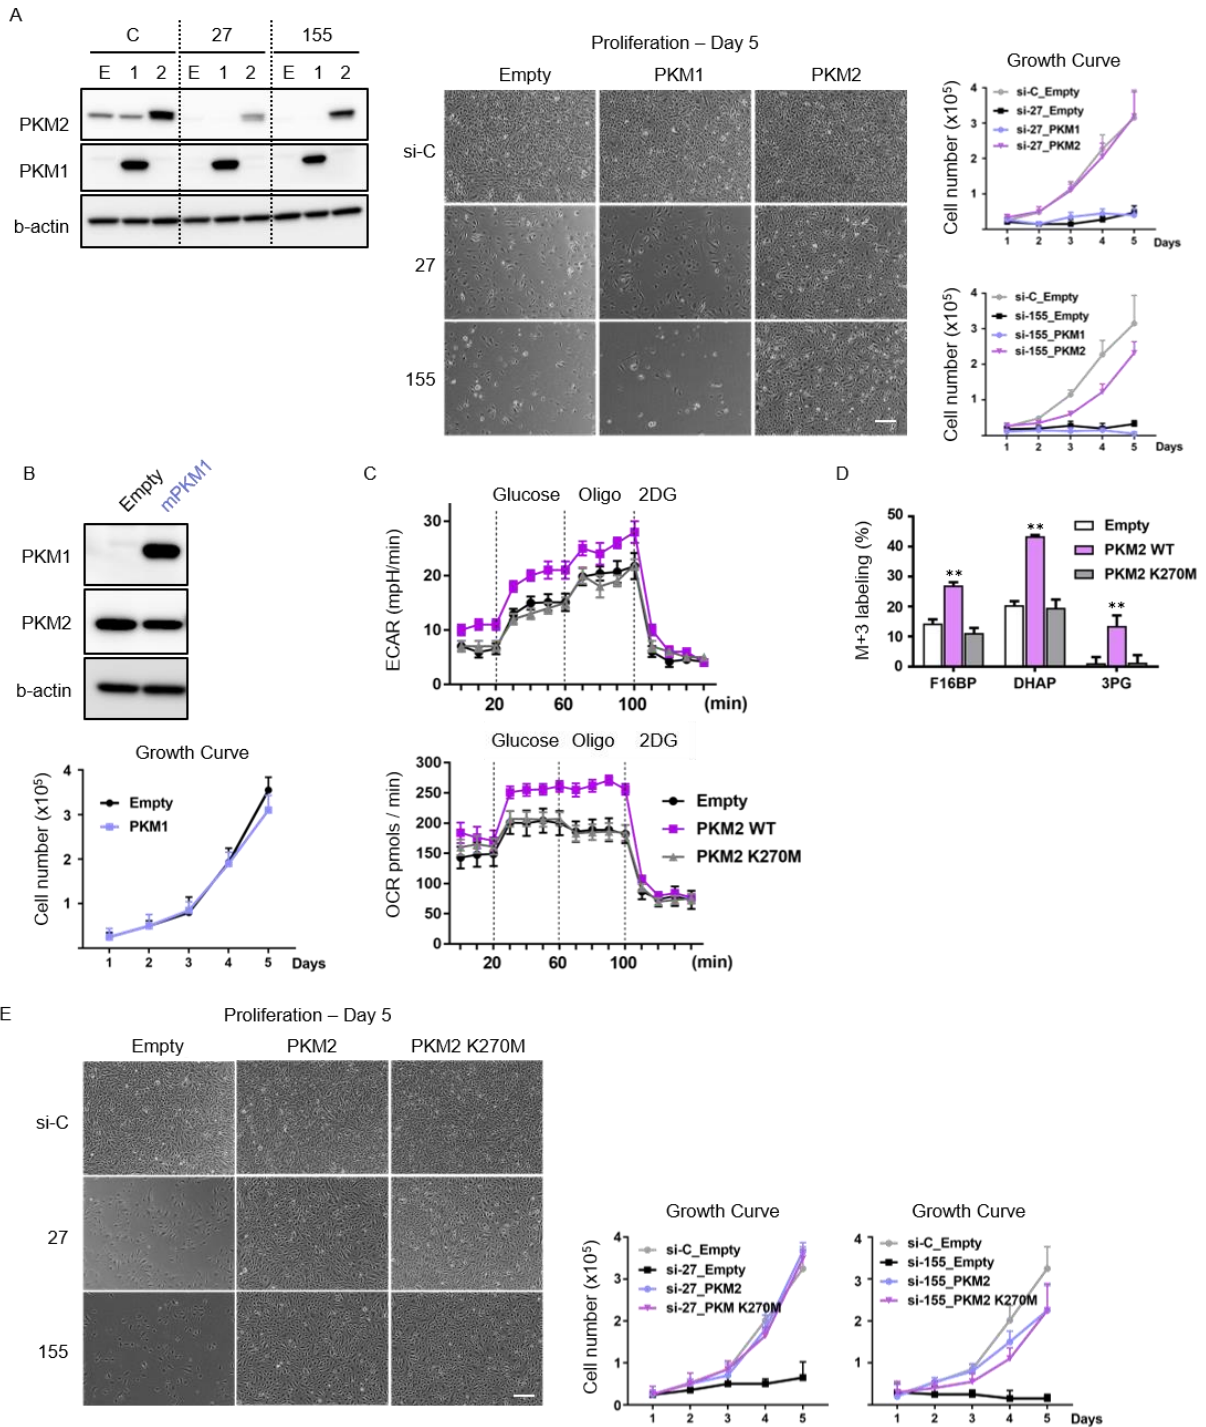

57

58 **Supplementary Figure 4. Pyruvate kinase activity of PKM is dispensable for EC**  
 59 **proliferation.**

60 (A) Western blot analysis (left panel) and proliferation assay (middle and right panels) with  
 61 overexpression of empty vector (E), PKM1 (1), or PKM2 (2) in the presence of si-27 or si-155.  
 62 Cells were collected at the end of proliferation assay (day 5) and applied for western blot to



63 confirm stable overexpressions of PKM1 or PKM2. Scale bar = 100  $\mu$ m.  $n = 4$ . (B) Western blot  
64 analysis (upper panel) and proliferation assay (lower panel) with overexpression of PKM1  
65 without knockdown of endogenous PKM in HUVECs.  $n = 4$ . (C) ECAR and OCR during  
66 glycolysis test with glucose, oligomycin, and 2DG treatment.  $n = 8$ . (D) Glycolysis flux  
67 estimated by incorporation of [U-13C] glucose into M+3 labeling of fructose-1-6-bisphosphate  
68 (F16BP), dihydroacetone phosphate (DHAP), and 3-phosphoglycerate (3PG).  $n = 3$ . (E)  
69 Proliferation assay with overexpression of empty vector, PKM2 WT, or PKM2 PEP binding  
70 mutant (K270M) in the presence of si-27 or si-155. Scale bar = 100  $\mu$ m.  $n = 4$ . All data are  
71 represented as mean  $\pm$  STDEV. \* $P < 0.05$ . \*\* $P < 0.01$ , by two-tailed Student's  $t$ -test.  
72



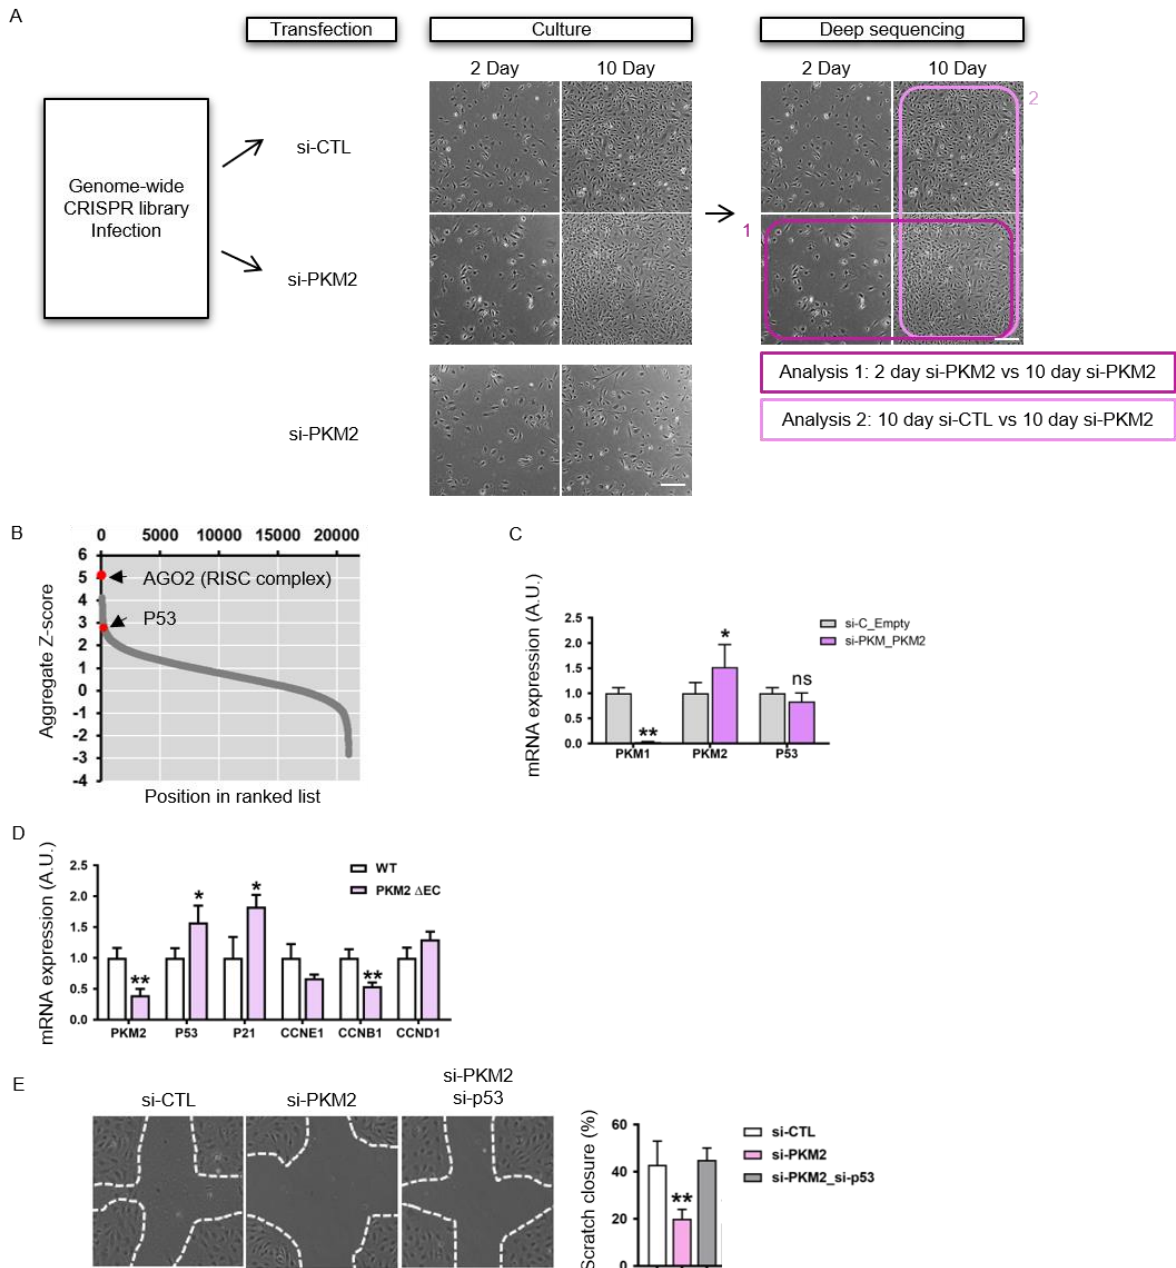

73

74 **Supplementary Figure 5. Elevated p53 expression suppresses EC proliferation in PKM2**  
 75 **depleted ECs.**

76 (A) Schematic of CRISPR screen. HUVECs were infected with genome-wide CRISPR library  
 77 and transfected with either si-CTL or si-PKM2. Transfected cells were cultured for short (2 day)  
 78 or long (10 day) period of time and then deep sequenced. Two different analysis were made: 1) 2  
 79 day after si-PKM2 vs 10 day after si-PKM2 (in purple) and 2) 10 day after si-CTL vs 10 day  
 80 after si-PKM2 (in pink). Representative phase contrast cell pictures are shown after indicated  
 81 time of cell culture in each condition. Scale bar = 100  $\mu$ m. (B) The Z scores from the two  
 82 different analysis above are combined and plotted as an Aggregate Z-score. Red dot on top

83 indicates AGO2, top #1 ranked, a major component of RISC complex. Red dot below indicates  
84 p53 that is ranked at top #179. (C) Reduced PKM1 expression does not alter p53 mRNA  
85 expression. p53 expression was compared in empty vector-overexpressing cells knocked down  
86 with si-C and PKM2-overexpressing cells knocked down with si-PKM, mimicking the effect of  
87 PKM1 knockdown.  $n = 3$ . (D) qPCR analysis in the ECs isolated from the lung of WT vs  
88 PKM2<sup>ΔEC</sup> mice after tamoxifen injection.  $n = 3$ . (E) Knockdown of p53 rescues scratch closure  
89 in PKM2 knockdown ECs.  $n = 4$ . Scale bar = 100 μm. All data are represented as mean ±  
90 STDEV. \* $P < 0.05$ . \*\* $P < 0.01$ , by two-tailed Student's  $t$ -test.

91

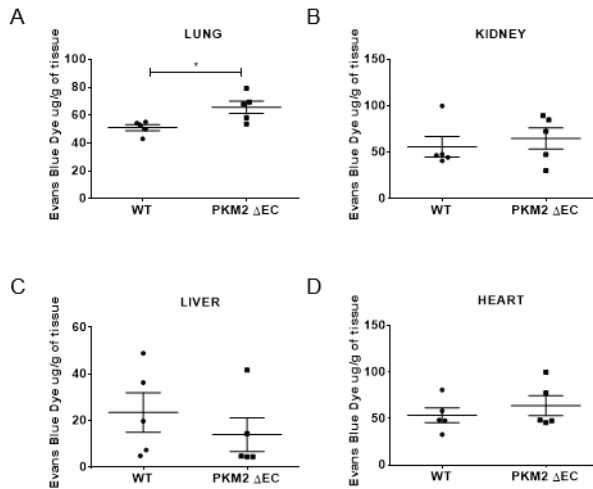

92

93 **Supplementary Figure 6. PKM2 $\Delta\text{EC}$  mice demonstrate increased basal pulmonary**  
 94 **microvascular permeability.**

95 Basal vascular permeability was assessed in various organs 30 minutes after intravenous injection  
 96 of Evans Blue dye. Quantification of extracted Evans Blue dye from lung (A), kidney (B), liver  
 97 (C), and heart (D) in WT vs PKM2 $\Delta\text{EC}$  mice. Evans Blue dyes were normalized to tissue weight  
 98 ( $\mu\text{g}$  of Evans Blue dye / g of tissue). Lung from PKM2 $\Delta\text{EC}$  mice shows significantly increased  
 99 leakage compared to littermate control mice.  $n = 5$  per group. All data are represented as mean  $\pm$   
 100 STDEV. \* $P < 0.05$ , by two-tailed Student's  $t$ -test.

101

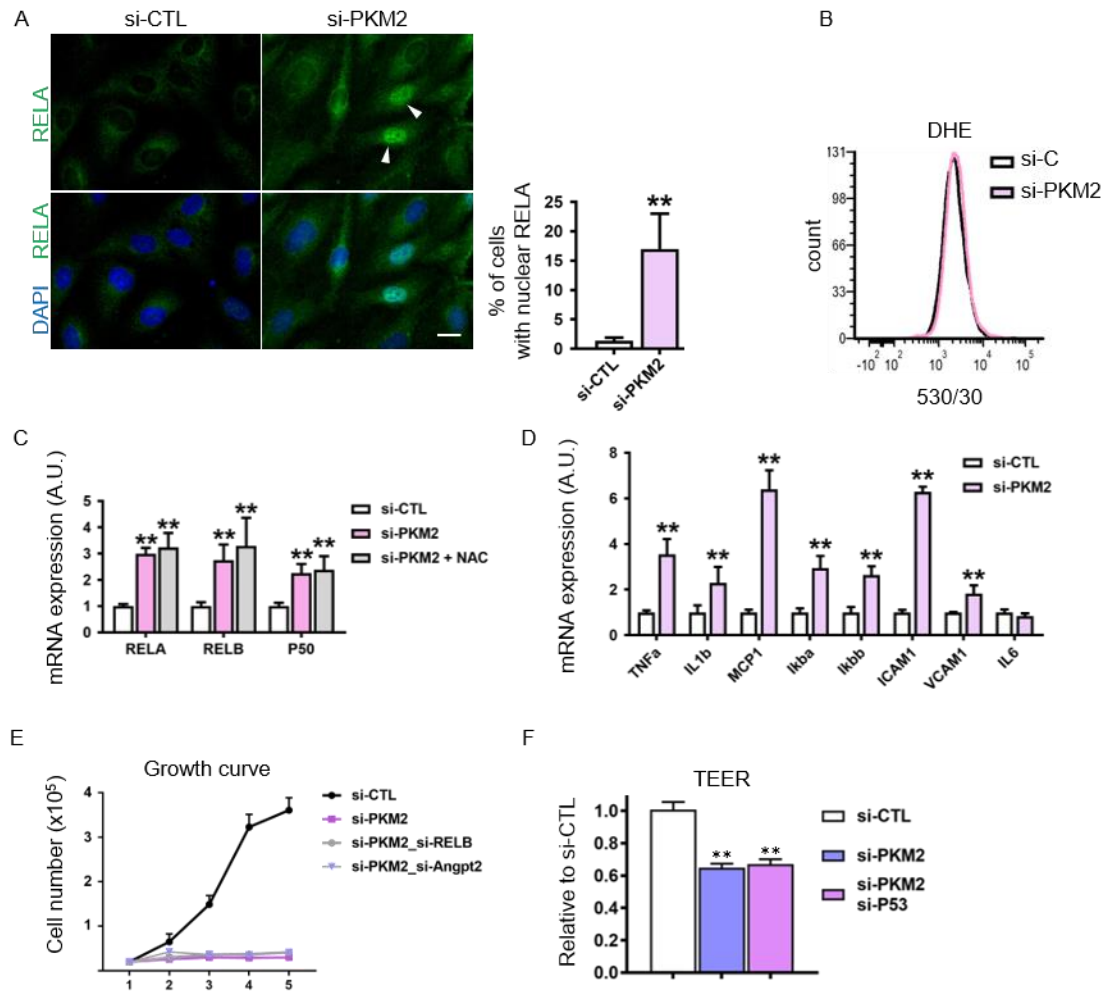

102

103 **Supplementary Figure 7. PKM2 knockdown activates NF- $\kappa$ B independent of ROS**  
 104 **production.**

105 (A) Induction of RELA localization into nucleus by PKM2 knockdown. Representative images  
 106 showing co-staining of RELA (green) and DAPI (blue) (left panel) and quantification of the  
 107 percentage of cells with nuclear RELB (right panel).  $n = 8$ . Scale bar = 10  $\mu$ m. (B) ROS  
 108 production was measured by DHE staining followed by flow cytometry in the ECs with si-CTL  
 109 vs si-PKM2. The data represents 3 independent experiments. (C) qPCR analysis of NF- $\kappa$ B  
 110 subunits in si-PKM2 ECs with or without NAC treatment.  $n = 3$ . (D) qPCR analysis of canonical  
 111 downstream targets of NF- $\kappa$ B in the ECs with si-CTL vs si-PKM2.  $n = 3$ . (E) Proliferation assay  
 112 with double knockdown of either RELB or Angpt2 on top of si-PKM2.  $n = 4$ . (F) TEER assay  
 113 with double knockdown of p53 on top of si-PKM2.  $n = 4$ . All data are represented as mean  $\pm$   
 114 STDEV.  $**P < 0.01$ , by two-tailed Student's  $t$ -test.
